# Supplementary material
Source: MDPI journal article supplement (https://www.mdpi.com/2073-4395/10/3/357)
Supplement: s1 [file s1]

## Sheet: readme
OTC	open top chamber
FACE	free air concentration enrichment
CF	charcoal filtered
NF	non-filtered
+O3	elevated ozone
SY	seed yield
SPC	seed protein concentration
SPY	seed protein yield
primary outlier	statistical outlier identified with ROUT method (Motulsky, H.J.; Brown, R.E. Detecting outliers when fitting data with nonlinear regression – a new method based on robust nonlinear regression and the false discovery rate. BMC Bioinformatics 2006, 7, 1-20.)
secondary outlier	if outlier is idenfied for one varible in an experiment, remaing response variables for the same treatment are also removed from data analysis

## Sheet: soybean
Reference	Country	Year	Fumigation facility	Rooting env.	# replicates	Cultivar	O3 treat.	O3 (ppb)	O3 time	SY_unit	SY	SPC (%)	SPY
Jaude, M.B.; Katerji, N.; Mastrorilli, M.; Rana, G. Analysis of the effect of ozone on soybean in the mediterranean region i. The consequences on crop-water status. Eur J Agron 2008, 28, 508-518. Jaoude, M.B.; Katerji, N.; Mastrorilli, M.; Rana, G. Analysis of the ozone effect on soybean in the mediterranean region ii. The consequences on growth, yield and water use efficiency. Eur J Agron 2008, …	Italy	2004	OTC	field	2	Casa	CF	31.2	7h	g m-2	282	32.77	92.4114
Jaude, M.B.; Katerji, N.; Mastrorilli, M.; Rana, G. Analysis of the effect of ozone on soybean in the mediterranean region i. The consequences on crop-water status. Eur J Agron 2008, 28, 508-518. Jaoude, M.B.; Katerji, N.; Mastrorilli, M.; Rana, G. Analysis of the ozone effect on soybean in the mediterranean region ii. The consequences on growth, yield and water use efficiency. Eur J Agron 2008, …	Italy	2004	OTC	field	2	Casa	NF+O3	44.7	7h	g m-2	150	30.61	45.915
Kress, L.W.; Miller, B. Impact of ozone on soybean yield. J Environ Qual 1983, 12, 276-281.	USA	1980	OTC	field	4	Corsoy	CF	37	7h	g m-2	265.6	38.9	103.318
Kress, L.W.; Miller, B. Impact of ozone on soybean yield. J Environ Qual 1983, 12, 276-281.	USA	1980	OTC	field	4	Corsoy	NF	50	7h	g m-2	259.1	38.3	99.2353
Kress, L.W.; Miller, B. Impact of ozone on soybean yield. J Environ Qual 1983, 12, 276-281.	USA	1980	OTC	field	4	Corsoy	NF+O3	64	7h	g m-2	217	39.6	85.932
Kress, L.W.; Miller, B. Impact of ozone on soybean yield. J Environ Qual 1983, 12, 276-281.	USA	1980	OTC	field	4	Corsoy	NF+O3	79	7h	g m-2	170.7	39.5	67.4265
Kress, L.W.; Miller, B. Impact of ozone on soybean yield. J Environ Qual 1983, 12, 276-281.	USA	1980	OTC	field	4	Corsoy	NF+O3	94	7h	g m-2	134.8	40.7	54.8636
Heagle, A.S.; Miller, J.E.; Booker, F.L. Influence of ozone stress on soybean response to carbon dioxide enrichment: I. Foliar properties. Crop Sci 1998, 38, 113-121.	USA	1993	OTC	pots	2	Essex	CF	20	12h	g plant-1	147	43.3	63.651
Heagle, A.S.; Miller, J.E.; Booker, F.L. Influence of ozone stress on soybean response to carbon dioxide enrichment: I. Foliar properties. Crop Sci 1998, 38, 113-121.	USA	1993	OTC	pots	2	Essex	NF	50	12h	g plant-1	124	41.1	50.964
Heagle, A.S.; Miller, J.E.; Booker, F.L. Influence of ozone stress on soybean response to carbon dioxide enrichment: I. Foliar properties. Crop Sci 1998, 38, 113-121.	USA	1993	OTC	pots	2	Essex	NF+O3	79	12h	g plant-1	92	41.9	38.548
Heagle, A.S.; Miller, J.E.; Booker, F.L. Influence of ozone stress on soybean response to carbon dioxide enrichment: I. Foliar properties. Crop Sci 1998, 38, 113-121.	USA	1994	OTC	pots	2	Essex	CF	18	12h	g plant-1	124	41.8	51.832
Heagle, A.S.; Miller, J.E.; Booker, F.L. Influence of ozone stress on soybean response to carbon dioxide enrichment: I. Foliar properties. Crop Sci 1998, 38, 113-121.	USA	1994	OTC	pots	2	Essex	NF	42	12h	g plant-1	106	39.2	41.552
Heagle, A.S.; Miller, J.E.; Booker, F.L. Influence of ozone stress on soybean response to carbon dioxide enrichment: I. Foliar properties. Crop Sci 1998, 38, 113-121.	USA	1994	OTC	pots	2	Essex	NF+O3	69	12h	g plant-1	74	39.1	28.934
Heagle, A.S.; Miller, J.E.; Booker, F.L. Influence of ozone stress on soybean response to carbon dioxide enrichment: I. Foliar properties. Crop Sci 1998, 38, 113-121.	USA	1994	OTC	pots	2	Holladay	CF	18	12h	g plant-1	112	38.3	42.896
Heagle, A.S.; Miller, J.E.; Booker, F.L. Influence of ozone stress on soybean response to carbon dioxide enrichment: I. Foliar properties. Crop Sci 1998, 38, 113-121.	USA	1994	OTC	pots	2	Holladay	NF	42	12h	g plant-1	87	38.2	33.234
Heagle, A.S.; Miller, J.E.; Booker, F.L. Influence of ozone stress on soybean response to carbon dioxide enrichment: I. Foliar properties. Crop Sci 1998, 38, 113-121.	USA	1994	OTC	pots	2	Holladay	NF+O3	69	12h	g plant-1	72	36.6	26.352
Heagle, A.S.; Miller, J.E.; Booker, F.L. Influence of ozone stress on soybean response to carbon dioxide enrichment: I. Foliar properties. Crop Sci 1998, 38, 113-121.	USA	1994	OTC	pots	2	NK-6955	CF	18	12h	g plant-1	119	42.3	50.337
Heagle, A.S.; Miller, J.E.; Booker, F.L. Influence of ozone stress on soybean response to carbon dioxide enrichment: I. Foliar properties. Crop Sci 1998, 38, 113-121.	USA	1994	OTC	pots	2	NK-6955	NF	42	12h	g plant-1	174	41.7	72.558
Heagle, A.S.; Miller, J.E.; Booker, F.L. Influence of ozone stress on soybean response to carbon dioxide enrichment: I. Foliar properties. Crop Sci 1998, 38, 113-121.	USA	1994	OTC	pots	2	NK-6955	NF+O3	69	12h	g plant-1	124	39.7	49.228
Mulchi, C.L.; Lee, E.; Tuthill, K.; Olinick, E.V. Influence of ozone stress on growth-processes, yields and grain quality characteristics among soybean cultivars. Environ Pollut 1988, 53, 151-169.	USA	1984/1985	OTC	field	2	Calland	CF	21.5056	9h	g m-2	389	40.5	157.545
Mulchi, C.L.; Lee, E.; Tuthill, K.; Olinick, E.V. Influence of ozone stress on growth-processes, yields and grain quality characteristics among soybean cultivars. Environ Pollut 1988, 53, 151-169.	USA	1984/1985	OTC	field	2	Calland	NF+O3	65.7944	9h	g m-2	323	42	135.66
Mulchi, C.L.; Lee, E.; Tuthill, K.; Olinick, E.V. Influence of ozone stress on growth-processes, yields and grain quality characteristics among soybean cultivars. Environ Pollut 1988, 53, 151-169.	USA	1984/1985	OTC	field	2	Cumberland	CF	21.5056	9h	g m-2	303	39.9	120.897
Mulchi, C.L.; Lee, E.; Tuthill, K.; Olinick, E.V. Influence of ozone stress on growth-processes, yields and grain quality characteristics among soybean cultivars. Environ Pollut 1988, 53, 151-169.	USA	1984/1985	OTC	field	2	Cumberland	NF+O3	65.7944	9h	g m-2	415	39.8	165.17
Mulchi, C.L.; Lee, E.; Tuthill, K.; Olinick, E.V. Influence of ozone stress on growth-processes, yields and grain quality characteristics among soybean cultivars. Environ Pollut 1988, 53, 151-169.	USA	1984/1985	OTC	field	2	Pella	CF	21.5056	9h	g m-2	324	41	132.84
Mulchi, C.L.; Lee, E.; Tuthill, K.; Olinick, E.V. Influence of ozone stress on growth-processes, yields and grain quality characteristics among soybean cultivars. Environ Pollut 1988, 53, 151-169.	USA	1984/1985	OTC	field	2	Pella	NF+O3	65.7944	9h	g m-2	323	39.9	128.877
Mulchi, C.L.; Lee, E.; Tuthill, K.; Olinick, E.V. Influence of ozone stress on growth-processes, yields and grain quality characteristics among soybean cultivars. Environ Pollut 1988, 53, 151-169.	USA	1984/1985	OTC	field	2	Williams	CF	21.5056	9h	g m-2	390	40.9	159.51
Mulchi, C.L.; Lee, E.; Tuthill, K.; Olinick, E.V. Influence of ozone stress on growth-processes, yields and grain quality characteristics among soybean cultivars. Environ Pollut 1988, 53, 151-169.	USA	1984/1985	OTC	field	2	Williams	NF+O3	65.7944	9h	g m-2	258	41.5	107.07
Mulchi, C.L.; Lee, E.; Tuthill, K.; Olinick, E.V. Influence of ozone stress on growth-processes, yields and grain quality characteristics among soybean cultivars. Environ Pollut 1988, 53, 151-169.	USA	1984/1985	OTC	field	2	Miles	CF	21.5056	9h	g m-2	329	41.9	137.851
Mulchi, C.L.; Lee, E.; Tuthill, K.; Olinick, E.V. Influence of ozone stress on growth-processes, yields and grain quality characteristics among soybean cultivars. Environ Pollut 1988, 53, 151-169.	USA	1984/1985	OTC	field	2	Miles	NF+O3	65.7944	9h	g m-2	302	42.4	128.048
Mulchi, C.L.; Lee, E.; Tuthill, K.; Olinick, E.V. Influence of ozone stress on growth-processes, yields and grain quality characteristics among soybean cultivars. Environ Pollut 1988, 53, 151-169.	USA	1984/1985	OTC	field	2	Sparks	CF	21.5056	9h	g m-2	449	39.9	179.151
Mulchi, C.L.; Lee, E.; Tuthill, K.; Olinick, E.V. Influence of ozone stress on growth-processes, yields and grain quality characteristics among soybean cultivars. Environ Pollut 1988, 53, 151-169.	USA	1984/1985	OTC	field	2	Sparks	NF+O3	65.7944	9h	g m-2	373	40.5	151.065
Mulchi, C.L.; Lee, E.; Tuthill, K.; Olinick, E.V. Influence of ozone stress on growth-processes, yields and grain quality characteristics among soybean cultivars. Environ Pollut 1988, 53, 151-169.	USA	1984/1985	OTC	field	2	Union	CF	21.5056	9h	g m-2	458	41.7	190.986
Mulchi, C.L.; Lee, E.; Tuthill, K.; Olinick, E.V. Influence of ozone stress on growth-processes, yields and grain quality characteristics among soybean cultivars. Environ Pollut 1988, 53, 151-169.	USA	1984/1985	OTC	field	2	Union	NF+O3	65.7944	9h	g m-2	248	43.3	107.384
Mulchi, C.L.; Lee, E.; Tuthill, K.; Olinick, E.V. Influence of ozone stress on growth-processes, yields and grain quality characteristics among soybean cultivars. Environ Pollut 1988, 53, 151-169.	USA	1984/1985	OTC	field	2	Ware	CF	21.5056	9h	g m-2	388	39.3	152.484
Mulchi, C.L.; Lee, E.; Tuthill, K.; Olinick, E.V. Influence of ozone stress on growth-processes, yields and grain quality characteristics among soybean cultivars. Environ Pollut 1988, 53, 151-169.	USA	1984/1985	OTC	field	2	Ware	NF+O3	65.7944	9h	g m-2	326	40.3	131.378
Mulchi, C.L.; Lee, E.; Tuthill, K.; Olinick, E.V. Influence of ozone stress on growth-processes, yields and grain quality characteristics among soybean cultivars. Environ Pollut 1988, 53, 151-169.	USA	1984/1985	OTC	field	2	Bay	CF	21.5056	9h	g m-2	312	39	121.68
Mulchi, C.L.; Lee, E.; Tuthill, K.; Olinick, E.V. Influence of ozone stress on growth-processes, yields and grain quality characteristics among soybean cultivars. Environ Pollut 1988, 53, 151-169.	USA	1984/1985	OTC	field	2	Bay	NF+O3	65.7944	9h	g m-2	301	40.1	120.701
Mulchi, C.L.; Lee, E.; Tuthill, K.; Olinick, E.V. Influence of ozone stress on growth-processes, yields and grain quality characteristics among soybean cultivars. Environ Pollut 1988, 53, 151-169.	USA	1984/1985	OTC	field	2	Essex	CF	21.5056	9h	g m-2	391	40.4	157.964
Mulchi, C.L.; Lee, E.; Tuthill, K.; Olinick, E.V. Influence of ozone stress on growth-processes, yields and grain quality characteristics among soybean cultivars. Environ Pollut 1988, 53, 151-169.	USA	1984/1985	OTC	field	2	Essex	NF+O3	65.7944	9h	g m-2	414	41.4	171.396
Mulchi, C.L.; Lee, E.; Tuthill, K.; Olinick, E.V. Influence of ozone stress on growth-processes, yields and grain quality characteristics among soybean cultivars. Environ Pollut 1988, 53, 151-169.	USA	1984/1985	OTC	field	2	Forrest	CF	21.5056	9h	g m-2	372	37.4	139.128
Mulchi, C.L.; Lee, E.; Tuthill, K.; Olinick, E.V. Influence of ozone stress on growth-processes, yields and grain quality characteristics among soybean cultivars. Environ Pollut 1988, 53, 151-169.	USA	1984/1985	OTC	field	2	Forrest	NF+O3	65.7944	9h	g m-2	243	38.5	93.555
Mulchi, C.L.; Lee, E.; Tuthill, K.; Olinick, E.V. Influence of ozone stress on growth-processes, yields and grain quality characteristics among soybean cultivars. Environ Pollut 1988, 53, 151-169.	USA	1984/1985	OTC	field	2	York	CF	21.5056	9h	g m-2	307	37.8	116.046
Mulchi, C.L.; Lee, E.; Tuthill, K.; Olinick, E.V. Influence of ozone stress on growth-processes, yields and grain quality characteristics among soybean cultivars. Environ Pollut 1988, 53, 151-169.	USA	1984/1985	OTC	field	2	York	NF+O3	65.7944	9h	g m-2	332	39.3	130.476
Pausch, R.C.; Mulchi, C.L.; Lee, E.H.; Meisinger, J.J. Use of c-13 and n-15 isotopes to investigate o-3 effects on c and n metabolism in soybeans .2. Nitrogen uptake, fixation, and partitioning. Agr Ecosyst Environ 1996, 60, 61-69.	USA	1987	OTC	field	4	Clark	CF	28	6h	g plant-1	2.39	36.984	0.883918
Pausch, R.C.; Mulchi, C.L.; Lee, E.H.; Meisinger, J.J. Use of c-13 and n-15 isotopes to investigate o-3 effects on c and n metabolism in soybeans .2. Nitrogen uptake, fixation, and partitioning. Agr Ecosyst Environ 1996, 60, 61-69.	USA	1987	OTC	field	4	Clark	CF+O3	45	6h	g plant-1	3.4	35.328	1.20115
Pausch, R.C.; Mulchi, C.L.; Lee, E.H.; Meisinger, J.J. Use of c-13 and n-15 isotopes to investigate o-3 effects on c and n metabolism in soybeans .2. Nitrogen uptake, fixation, and partitioning. Agr Ecosyst Environ 1996, 60, 61-69.	USA	1987	OTC	field	4	Clark	CF+O3	80	6h	g plant-1	3.06	34.776	1.06415
Pausch, R.C.; Mulchi, C.L.; Lee, E.H.; Meisinger, J.J. Use of c-13 and n-15 isotopes to investigate o-3 effects on c and n metabolism in soybeans .2. Nitrogen uptake, fixation, and partitioning. Agr Ecosyst Environ 1996, 60, 61-69.	USA	1988	OTC	field	4	Clark	CF	29	6h	g plant-1	5.3	32.016	1.69685
Pausch, R.C.; Mulchi, C.L.; Lee, E.H.; Meisinger, J.J. Use of c-13 and n-15 isotopes to investigate o-3 effects on c and n metabolism in soybeans .2. Nitrogen uptake, fixation, and partitioning. Agr Ecosyst Environ 1996, 60, 61-69.	USA	1988	OTC	field	4	Clark	CF+O3	47	6h	g plant-1	3.89	30.36	1.181
Pausch, R.C.; Mulchi, C.L.; Lee, E.H.; Meisinger, J.J. Use of c-13 and n-15 isotopes to investigate o-3 effects on c and n metabolism in soybeans .2. Nitrogen uptake, fixation, and partitioning. Agr Ecosyst Environ 1996, 60, 61-69.	USA	1988	OTC	field	4	Clark	CF+O3	76	6h	g plant-1	3.73	30.36	1.13243
Mulchi, C.L.; Slaughter, L.; Saleem, M.; Lee, E.H.; Pausch, R.; Rowland, R. Growth and physiological-characteristics of soybean in open-top chambers in response to ozone and increased atmospheric co2. Agr Ecosyst Environ 1992, 38, 107-118.	USA	1989	OTC	field	2	Clark	CF	23	7h	g	513	40.1	205.713
Mulchi, C.L.; Slaughter, L.; Saleem, M.; Lee, E.H.; Pausch, R.; Rowland, R. Growth and physiological-characteristics of soybean in open-top chambers in response to ozone and increased atmospheric co2. Agr Ecosyst Environ 1992, 38, 107-118.	USA	1989	OTC	field	2	Clark	NF	40.3	7h	g	432	40.4	174.528
Mulchi, C.L.; Slaughter, L.; Saleem, M.; Lee, E.H.; Pausch, R.; Rowland, R. Growth and physiological-characteristics of soybean in open-top chambers in response to ozone and increased atmospheric co2. Agr Ecosyst Environ 1992, 38, 107-118.	USA	1989	OTC	field	2	Clark	NF+O3	66.4	7h	g	363	40.8	148.104
Zhang, W.W.; Wang, G.G.; Liu, X.B.; Feng, Z.Z. Effects of elevated o3 exposure on seed yield, n concentration and photosynthesis of nine soybean cultivars (glycine max (l.) merr.) in northeast china. Plant Sci 2014, 226, 172-181.	China		OTC	pots	3	HF25	CF	9.92	8h	g plant-1	19	39.7992	7.56185
Zhang, W.W.; Wang, G.G.; Liu, X.B.; Feng, Z.Z. Effects of elevated o3 exposure on seed yield, n concentration and photosynthesis of nine soybean cultivars (glycine max (l.) merr.) in northeast china. Plant Sci 2014, 226, 172-181.	China		OTC	pots	3	HF25	NF+O3	58.6	8h	g plant-1	11.6	38.6952	4.48864
Zhang, W.W.; Wang, G.G.; Liu, X.B.; Feng, Z.Z. Effects of elevated o3 exposure on seed yield, n concentration and photosynthesis of nine soybean cultivars (glycine max (l.) merr.) in northeast china. Plant Sci 2014, 226, 172-181.	China		OTC	pots	3	HF35	CF	9.92	8h	g plant-1	17.4	36.2112	6.30075
Zhang, W.W.; Wang, G.G.; Liu, X.B.; Feng, Z.Z. Effects of elevated o3 exposure on seed yield, n concentration and photosynthesis of nine soybean cultivars (glycine max (l.) merr.) in northeast china. Plant Sci 2014, 226, 172-181.	China		OTC	pots	3	HF35	NF+O3	58.6	8h	g plant-1	11.7	37.3152	4.36588
Zhang, W.W.; Wang, G.G.; Liu, X.B.; Feng, Z.Z. Effects of elevated o3 exposure on seed yield, n concentration and photosynthesis of nine soybean cultivars (glycine max (l.) merr.) in northeast china. Plant Sci 2014, 226, 172-181.	China		OTC	pots	3	HF55	CF	9.92	8h	g plant-1	16.9	37.8672	6.39956
Zhang, W.W.; Wang, G.G.; Liu, X.B.; Feng, Z.Z. Effects of elevated o3 exposure on seed yield, n concentration and photosynthesis of nine soybean cultivars (glycine max (l.) merr.) in northeast china. Plant Sci 2014, 226, 172-181.	China		OTC	pots	3	HF55	NF+O3	58.6	8h	g plant-1	11.4	37.0392	4.22247
Zhang, W.W.; Wang, G.G.; Liu, X.B.; Feng, Z.Z. Effects of elevated o3 exposure on seed yield, n concentration and photosynthesis of nine soybean cultivars (glycine max (l.) merr.) in northeast china. Plant Sci 2014, 226, 172-181.	China		OTC	pots	3	HN35	CF	9.92	8h	g plant-1	12.8	36.984	4.73395
Zhang, W.W.; Wang, G.G.; Liu, X.B.; Feng, Z.Z. Effects of elevated o3 exposure on seed yield, n concentration and photosynthesis of nine soybean cultivars (glycine max (l.) merr.) in northeast china. Plant Sci 2014, 226, 172-181.	China		OTC	pots	3	HN35	NF+O3	58.6	8h	g plant-1	6.9	37.0392	2.5557
Zhang, W.W.; Wang, G.G.; Liu, X.B.; Feng, Z.Z. Effects of elevated o3 exposure on seed yield, n concentration and photosynthesis of nine soybean cultivars (glycine max (l.) merr.) in northeast china. Plant Sci 2014, 226, 172-181.	China		OTC	pots	3	HN37	CF	9.92	8h	g plant-1	20.4	33.2304	6.779
Zhang, W.W.; Wang, G.G.; Liu, X.B.; Feng, Z.Z. Effects of elevated o3 exposure on seed yield, n concentration and photosynthesis of nine soybean cultivars (glycine max (l.) merr.) in northeast china. Plant Sci 2014, 226, 172-181.	China		OTC	pots	3	HN37	NF+O3	58.6	8h	g plant-1	12.4	33.396	4.1411
Zhang, W.W.; Wang, G.G.; Liu, X.B.; Feng, Z.Z. Effects of elevated o3 exposure on seed yield, n concentration and photosynthesis of nine soybean cultivars (glycine max (l.) merr.) in northeast china. Plant Sci 2014, 226, 172-181.	China		OTC	pots	3	HN65	CF	9.92	8h	g plant-1	17	34.7208	5.90254
Zhang, W.W.; Wang, G.G.; Liu, X.B.; Feng, Z.Z. Effects of elevated o3 exposure on seed yield, n concentration and photosynthesis of nine soybean cultivars (glycine max (l.) merr.) in northeast china. Plant Sci 2014, 226, 172-181.	China		OTC	pots	3	HN65	NF+O3	58.6	8h	g plant-1	9.9	35.1624	3.48108
Zhang, W.W.; Wang, G.G.; Liu, X.B.; Feng, Z.Z. Effects of elevated o3 exposure on seed yield, n concentration and photosynthesis of nine soybean cultivars (glycine max (l.) merr.) in northeast china. Plant Sci 2014, 226, 172-181.	China		OTC	pots	3	SN22	CF	9.92	8h	g plant-1	18.7	34.8312	6.51343
Zhang, W.W.; Wang, G.G.; Liu, X.B.; Feng, Z.Z. Effects of elevated o3 exposure on seed yield, n concentration and photosynthesis of nine soybean cultivars (glycine max (l.) merr.) in northeast china. Plant Sci 2014, 226, 172-181.	China		OTC	pots	3	SN22	NF+O3	58.6	8h	g plant-1	10.4	37.536	3.90374
Zhang, W.W.; Wang, G.G.; Liu, X.B.; Feng, Z.Z. Effects of elevated o3 exposure on seed yield, n concentration and photosynthesis of nine soybean cultivars (glycine max (l.) merr.) in northeast china. Plant Sci 2014, 226, 172-181.	China		OTC	pots	3	SN26	CF	9.92	8h	g plant-1	16.4	37.5912	6.16496
Zhang, W.W.; Wang, G.G.; Liu, X.B.; Feng, Z.Z. Effects of elevated o3 exposure on seed yield, n concentration and photosynthesis of nine soybean cultivars (glycine max (l.) merr.) in northeast china. Plant Sci 2014, 226, 172-181.	China		OTC	pots	3	SN26	NF+O3	58.6	8h	g plant-1	9.5	31.74	3.0153
Zhang, W.W.; Wang, G.G.; Liu, X.B.; Feng, Z.Z. Effects of elevated o3 exposure on seed yield, n concentration and photosynthesis of nine soybean cultivars (glycine max (l.) merr.) in northeast china. Plant Sci 2014, 226, 172-181.	China		OTC	pots	3	SN31	CF	9.92	8h	g plant-1	19.5	38.5848	7.52404
Zhang, W.W.; Wang, G.G.; Liu, X.B.; Feng, Z.Z. Effects of elevated o3 exposure on seed yield, n concentration and photosynthesis of nine soybean cultivars (glycine max (l.) merr.) in northeast china. Plant Sci 2014, 226, 172-181.	China		OTC	pots	3	SN31	NF+O3	58.6	8h	g plant-1	11.9	38.2536	4.55218

## Sheet: rice
Reference	Country	Year	Fumigation facility	Rooting env.	# replicates	Cultivar	O3 treat.	O3 (ppb)	O3 time	SY_unit	SY	SPC (%)	SPY
Sarkar, A.; Singh, A.A.; Agrawal, S.B.; Ahmad, A.; Rai, S.P. Cultivar specific variations in antioxidative defense system, genome and proteome of two tropical rice cultivars against ambient and elevated ozone. Ecotoxicology and Environmental Safety 2015, 115, 101-111.	India		OTC	field	3	Malviya dhan 36	CF	5.6		g plant-1	87	9.88	8.5956
Sarkar, A.; Singh, A.A.; Agrawal, S.B.; Ahmad, A.; Rai, S.P. Cultivar specific variations in antioxidative defense system, genome and proteome of two tropical rice cultivars against ambient and elevated ozone. Ecotoxicology and Environmental Safety 2015, 115, 101-111.	India		OTC	field	3	Malviya dhan 36	NF	52.2		g plant-1	77.3	8.98	6.94154
Sarkar, A.; Singh, A.A.; Agrawal, S.B.; Ahmad, A.; Rai, S.P. Cultivar specific variations in antioxidative defense system, genome and proteome of two tropical rice cultivars against ambient and elevated ozone. Ecotoxicology and Environmental Safety 2015, 115, 101-111.	India		OTC	field	3	Malviya dhan 36	NF+O3	62.2		g plant-1	67.3	8.81	5.92913
Sarkar, A.; Singh, A.A.; Agrawal, S.B.; Ahmad, A.; Rai, S.P. Cultivar specific variations in antioxidative defense system, genome and proteome of two tropical rice cultivars against ambient and elevated ozone. Ecotoxicology and Environmental Safety 2015, 115, 101-111.	India		OTC	field	3	Malviya dhan 36	NF+O3	72.6		g plant-1	55.1	8.22	4.52922
Sarkar, A.; Singh, A.A.; Agrawal, S.B.; Ahmad, A.; Rai, S.P. Cultivar specific variations in antioxidative defense system, genome and proteome of two tropical rice cultivars against ambient and elevated ozone. Ecotoxicology and Environmental Safety 2015, 115, 101-111.	India		OTC	field	3	Shivani	CF	5.6		g plant-1	131	12.2	15.982
Sarkar, A.; Singh, A.A.; Agrawal, S.B.; Ahmad, A.; Rai, S.P. Cultivar specific variations in antioxidative defense system, genome and proteome of two tropical rice cultivars against ambient and elevated ozone. Ecotoxicology and Environmental Safety 2015, 115, 101-111.	India		OTC	field	3	Shivani	NF	52.2		g plant-1	114	11.9	13.566
Sarkar, A.; Singh, A.A.; Agrawal, S.B.; Ahmad, A.; Rai, S.P. Cultivar specific variations in antioxidative defense system, genome and proteome of two tropical rice cultivars against ambient and elevated ozone. Ecotoxicology and Environmental Safety 2015, 115, 101-111.	India		OTC	field	3	Shivani	NF+O3	62.2		g plant-1	93.5	11.3	10.5655
Sarkar, A.; Singh, A.A.; Agrawal, S.B.; Ahmad, A.; Rai, S.P. Cultivar specific variations in antioxidative defense system, genome and proteome of two tropical rice cultivars against ambient and elevated ozone. Ecotoxicology and Environmental Safety 2015, 115, 101-111.	India		OTC	field	3	Shivani	NF+O3	72.6		g plant-1	74.7	11	8.217
Zheng, F.; Wang, X.; Zhang, W.; Hou, P.; Lu, F.; Du, K.; Sun, Z. Effects of elevated o(3) exposure on nutrient elements and quality of winter wheat and rice grain in yangtze river delta, china. Environmental pollution 2013, 179, 19-26.	China	2007	OTC	field	3	Fan 3694	CF	19.69		g plant-1	2.40517	8.15686	0.196186
Zheng, F.; Wang, X.; Zhang, W.; Hou, P.; Lu, F.; Du, K.; Sun, Z. Effects of elevated o(3) exposure on nutrient elements and quality of winter wheat and rice grain in yangtze river delta, china. Environmental pollution 2013, 179, 19-26.	China	2007	OTC	field	3	Fan 3694	NF	22.57		g plant-1	2.62931	8.60665	0.226296
Zheng, F.; Wang, X.; Zhang, W.; Hou, P.; Lu, F.; Du, K.; Sun, Z. Effects of elevated o(3) exposure on nutrient elements and quality of winter wheat and rice grain in yangtze river delta, china. Environmental pollution 2013, 179, 19-26.	China	2007	OTC	field	3	Fan 3694	NF+O3	69.6		g plant-1	1.85345	9.98611	0.185088
Zheng, F.; Wang, X.; Zhang, W.; Hou, P.; Lu, F.; Du, K.; Sun, Z. Effects of elevated o(3) exposure on nutrient elements and quality of winter wheat and rice grain in yangtze river delta, china. Environmental pollution 2013, 179, 19-26.	China	2007	OTC	field	3	Fan 3694	NF+O3	118.62		g plant-1	1.49138	11.2456	0.167715
Zheng, F.; Wang, X.; Zhang, W.; Hou, P.; Lu, F.; Du, K.; Sun, Z. Effects of elevated o(3) exposure on nutrient elements and quality of winter wheat and rice grain in yangtze river delta, china. Environmental pollution 2013, 179, 19-26.	China	2008	OTC	field	3	Fan 3694	CF	6.98		g plant-1	3.17241	8.33678	0.264477
Zheng, F.; Wang, X.; Zhang, W.; Hou, P.; Lu, F.; Du, K.; Sun, Z. Effects of elevated o(3) exposure on nutrient elements and quality of winter wheat and rice grain in yangtze river delta, china. Environmental pollution 2013, 179, 19-26.	China	2008	OTC	field	3	Fan 3694	NF	17.44		g plant-1	3.0431	8.48671	0.258259
Zheng, F.; Wang, X.; Zhang, W.; Hou, P.; Lu, F.; Du, K.; Sun, Z. Effects of elevated o(3) exposure on nutrient elements and quality of winter wheat and rice grain in yangtze river delta, china. Environmental pollution 2013, 179, 19-26.	China	2008	OTC	field	3	Fan 3694	NF+O3	82.23		g plant-1	2.08621	9.32637	0.194568
Zheng, F.; Wang, X.; Zhang, W.; Hou, P.; Lu, F.; Du, K.; Sun, Z. Effects of elevated o(3) exposure on nutrient elements and quality of winter wheat and rice grain in yangtze river delta, china. Environmental pollution 2013, 179, 19-26.	China	2008	OTC	field	3	Fan 3694	NF+O3	138.3		g plant-1	1.80172	10.1361	0.182624
Frei, M.; Kohno, Y.; Tietze, S.; Jekle, M.; Hussein, M.A.; Becker, T.; Becker, K. The response of rice grain quality to ozone exposure during growth depends on ozone level and genotype. Environ Pollut 2012, 163, 199-206.	Japan	2009	closed chamber	pots	4	IR64	CF	4.5	12h	g plant-1	10.3679	8.77734	0.910026
Frei, M.; Kohno, Y.; Tietze, S.; Jekle, M.; Hussein, M.A.; Becker, T.; Becker, K. The response of rice grain quality to ozone exposure during growth depends on ozone level and genotype. Environ Pollut 2012, 163, 199-206.	Japan	2009	closed chamber	pots	4	IR64	NF	38.7	12h	g plant-1	10.5053	9.55078	1.00334
Frei, M.; Kohno, Y.; Tietze, S.; Jekle, M.; Hussein, M.A.; Becker, T.; Becker, K. The response of rice grain quality to ozone exposure during growth depends on ozone level and genotype. Environ Pollut 2012, 163, 199-206.	Japan	2009	closed chamber	pots	4	IR64	NF+O3	82.3	12h	g plant-1	11.1987	9.66805	1.0827
Frei, M.; Kohno, Y.; Tietze, S.; Jekle, M.; Hussein, M.A.; Becker, T.; Becker, K. The response of rice grain quality to ozone exposure during growth depends on ozone level and genotype. Environ Pollut 2012, 163, 199-206.	Japan	2009	closed chamber	pots	4	IR64	NF+O3	110.5	12h	g plant-1	8.40939	9.62891	0.809733
Frei, M.; Kohno, Y.; Tietze, S.; Jekle, M.; Hussein, M.A.; Becker, T.; Becker, K. The response of rice grain quality to ozone exposure during growth depends on ozone level and genotype. Environ Pollut 2012, 163, 199-206.	Japan	2009	closed chamber	pots	4	Kirara 397	CF	4.5	12h	g plant-1	9.20037	10.875	1.00054
Frei, M.; Kohno, Y.; Tietze, S.; Jekle, M.; Hussein, M.A.; Becker, T.; Becker, K. The response of rice grain quality to ozone exposure during growth depends on ozone level and genotype. Environ Pollut 2012, 163, 199-206.	Japan	2009	closed chamber	pots	4	Kirara 397	NF	38.7	12h	g plant-1	7.04525	12.375	0.87185
Frei, M.; Kohno, Y.; Tietze, S.; Jekle, M.; Hussein, M.A.; Becker, T.; Becker, K. The response of rice grain quality to ozone exposure during growth depends on ozone level and genotype. Environ Pollut 2012, 163, 199-206.	Japan	2009	closed chamber	pots	4	Kirara 397	NF+O3	82.3	12h	g plant-1	5.59506	12.9375	0.723861
Frei, M.; Kohno, Y.; Tietze, S.; Jekle, M.; Hussein, M.A.; Becker, T.; Becker, K. The response of rice grain quality to ozone exposure during growth depends on ozone level and genotype. Environ Pollut 2012, 163, 199-206.	Japan	2009	closed chamber	pots	4	Kirara 397	NF+O3	110.5	12h	g plant-1	5.7902	14.3906	0.833244
Frei, M.; Kohno, Y.; Tietze, S.; Jekle, M.; Hussein, M.A.; Becker, T.; Becker, K. The response of rice grain quality to ozone exposure during growth depends on ozone level and genotype. Environ Pollut 2012, 163, 199-206.	Japan	2009	closed chamber	pots	4	Kasalath	CF	4.5	12h	g plant-1	10.7312	7.5625	0.81155
Frei, M.; Kohno, Y.; Tietze, S.; Jekle, M.; Hussein, M.A.; Becker, T.; Becker, K. The response of rice grain quality to ozone exposure during growth depends on ozone level and genotype. Environ Pollut 2012, 163, 199-206.	Japan	2009	closed chamber	pots	4	Kasalath	NF	38.7	12h	g plant-1	11.5526	7.65625	0.884498
Frei, M.; Kohno, Y.; Tietze, S.; Jekle, M.; Hussein, M.A.; Becker, T.; Becker, K. The response of rice grain quality to ozone exposure during growth depends on ozone level and genotype. Environ Pollut 2012, 163, 199-206.	Japan	2009	closed chamber	pots	4	Kasalath	NF+O3	82.3	12h	g plant-1	10.8402	8.1875	0.887538
Frei, M.; Kohno, Y.; Tietze, S.; Jekle, M.; Hussein, M.A.; Becker, T.; Becker, K. The response of rice grain quality to ozone exposure during growth depends on ozone level and genotype. Environ Pollut 2012, 163, 199-206.	Japan	2009	closed chamber	pots	4	Kasalath	NF+O3	110.5	12h	g plant-1	8.0122	8.15625	0.653495
Frei, M.; Kohno, Y.; Tietze, S.; Jekle, M.; Hussein, M.A.; Becker, T.; Becker, K. The response of rice grain quality to ozone exposure during growth depends on ozone level and genotype. Environ Pollut 2012, 163, 199-206.	Japan	2009	closed chamber	pots	4	Koshihikari	CF	4.5	12h	g plant-1	11.3993	7.7116	0.87907
Frei, M.; Kohno, Y.; Tietze, S.; Jekle, M.; Hussein, M.A.; Becker, T.; Becker, K. The response of rice grain quality to ozone exposure during growth depends on ozone level and genotype. Environ Pollut 2012, 163, 199-206.	Japan	2009	closed chamber	pots	4	Koshihikari	NF	38.7	12h	g plant-1	12.0659	8.18182	0.987209
Frei, M.; Kohno, Y.; Tietze, S.; Jekle, M.; Hussein, M.A.; Becker, T.; Becker, K. The response of rice grain quality to ozone exposure during growth depends on ozone level and genotype. Environ Pollut 2012, 163, 199-206.	Japan	2009	closed chamber	pots	4	Koshihikari	NF+O3	82.3	12h	g plant-1	10.4805	8.62069	0.903488
Frei, M.; Kohno, Y.; Tietze, S.; Jekle, M.; Hussein, M.A.; Becker, T.; Becker, K. The response of rice grain quality to ozone exposure during growth depends on ozone level and genotype. Environ Pollut 2012, 163, 199-206.	Japan	2009	closed chamber	pots	4	Koshihikari	NF+O3	110.5	12h	g plant-1	10.3137	8.99687	0.927907
Frei, M.; Kohno, Y.; Tietze, S.; Jekle, M.; Hussein, M.A.; Becker, T.; Becker, K. The response of rice grain quality to ozone exposure during growth depends on ozone level and genotype. Environ Pollut 2012, 163, 199-206.	Japan	2009	closed chamber	pots	4	Nipponbare	CF	4.5	12h	g plant-1	8.11882	7.78125	0.631746
Frei, M.; Kohno, Y.; Tietze, S.; Jekle, M.; Hussein, M.A.; Becker, T.; Becker, K. The response of rice grain quality to ozone exposure during growth depends on ozone level and genotype. Environ Pollut 2012, 163, 199-206.	Japan	2009	closed chamber	pots	4	Nipponbare	NF	38.7	12h	g plant-1	8.56447	8.5625	0.733333
Frei, M.; Kohno, Y.; Tietze, S.; Jekle, M.; Hussein, M.A.; Becker, T.; Becker, K. The response of rice grain quality to ozone exposure during growth depends on ozone level and genotype. Environ Pollut 2012, 163, 199-206.	Japan	2009	closed chamber	pots	4	Nipponbare	NF+O3	82.3	12h	g plant-1	8.35273	8.4375	0.704762
Frei, M.; Kohno, Y.; Tietze, S.; Jekle, M.; Hussein, M.A.; Becker, T.; Becker, K. The response of rice grain quality to ozone exposure during growth depends on ozone level and genotype. Environ Pollut 2012, 163, 199-206.	Japan	2009	closed chamber	pots	4	Nipponbare	NF+O3	110.5	12h	g plant-1	7.93764	8.71875	0.692063
Frei, M.; Kohno, Y.; Tietze, S.; Jekle, M.; Hussein, M.A.; Becker, T.; Becker, K. The response of rice grain quality to ozone exposure during growth depends on ozone level and genotype. Environ Pollut 2012, 163, 199-206.	Japan	2009	closed chamber	pots	4	SL41	CF	4.5	12h	g plant-1	8.29461	8.4953	0.704652
Frei, M.; Kohno, Y.; Tietze, S.; Jekle, M.; Hussein, M.A.; Becker, T.; Becker, K. The response of rice grain quality to ozone exposure during growth depends on ozone level and genotype. Environ Pollut 2012, 163, 199-206.	Japan	2009	closed chamber	pots	4	SL41	NF	38.7	12h	g plant-1	8.65807	8.74608	0.757242
Frei, M.; Kohno, Y.; Tietze, S.; Jekle, M.; Hussein, M.A.; Becker, T.; Becker, K. The response of rice grain quality to ozone exposure during growth depends on ozone level and genotype. Environ Pollut 2012, 163, 199-206.	Japan	2009	closed chamber	pots	4	SL41	NF+O3	82.3	12h	g plant-1	8.81069	9.12226	0.803734
Frei, M.; Kohno, Y.; Tietze, S.; Jekle, M.; Hussein, M.A.; Becker, T.; Becker, K. The response of rice grain quality to ozone exposure during growth depends on ozone level and genotype. Environ Pollut 2012, 163, 199-206.	Japan	2009	closed chamber	pots	4	SL41	NF+O3	110.5	12h	g plant-1	7.89348	8.84013	0.697794

## Sheet: wheat
Reference	Country	Year	Fumigation facility	Rooting env.	# replicates	Cultivar	O3 treat.	O3 (ppb)	O3 time	Nitrogen treat.	N app (kg/ha)	SY_unit	SY	SPC (%)	SPY
Vandermeiren, K.; Detemmerman, L.; Staquet, A.; Baeten, H. Effects of air filtration on spring wheat grown in open-top field chambers at a rural site .2. Effects on mineral partitioning, sulfur and nitrogen-metabolism and on grain quality. Environ Pollut 1992, 77, 7-14. De Temmerman, L.; Vandermeiren, K.; Guns, M. Effects of air filtration on spring wheat grown in open-top field chambers at a rur…	Belgium	1988	OTC	field	5	Pelican	CF	5	8h		99	g m-2	557	14.9	82.993
Vandermeiren, K.; Detemmerman, L.; Staquet, A.; Baeten, H. Effects of air filtration on spring wheat grown in open-top field chambers at a rural site .2. Effects on mineral partitioning, sulfur and nitrogen-metabolism and on grain quality. Environ Pollut 1992, 77, 7-14. De Temmerman, L.; Vandermeiren, K.; Guns, M. Effects of air filtration on spring wheat grown in open-top field chambers at a rur…	Belgium	1988	OTC	field	5	Pelican	NF	39	8h		99	g m-2	541	15.5	83.855
Piikki, K.; De Temmerman, L.; Ojanpera, K.; Danielsson, H.; Pleijel, H. The grain quality of spring wheat (triticum aestivum l.) in relation to elevated ozone uptake and carbon dioxide exposure. Eur J Agron 2008, 28, 245-254. Fangmeier, A.; De Temmerman, L.; Mortensen, L.; Kemp, K.; Burke, J.; Mitchell, R.; van Oijen, M.; Weigel, H.J. Effects on nutrients and on grain quality in spring wheat crop…	Belgium	1994	OTC	field	6	Minaret	CF	6.4789	7h			g m-2	634.733	11.45	72.677
Piikki, K.; De Temmerman, L.; Ojanpera, K.; Danielsson, H.; Pleijel, H. The grain quality of spring wheat (triticum aestivum l.) in relation to elevated ozone uptake and carbon dioxide exposure. Eur J Agron 2008, 28, 245-254. Fangmeier, A.; De Temmerman, L.; Mortensen, L.; Kemp, K.; Burke, J.; Mitchell, R.; van Oijen, M.; Weigel, H.J. Effects on nutrients and on grain quality in spring wheat crop…	Belgium	1994	OTC	field	6	Minaret	NF	35.349	7h			g m-2	618.7	11.8833	73.5222
Piikki, K.; De Temmerman, L.; Ojanpera, K.; Danielsson, H.; Pleijel, H. The grain quality of spring wheat (triticum aestivum l.) in relation to elevated ozone uptake and carbon dioxide exposure. Eur J Agron 2008, 28, 245-254. Fangmeier, A.; De Temmerman, L.; Mortensen, L.; Kemp, K.; Burke, J.; Mitchell, R.; van Oijen, M.; Weigel, H.J. Effects on nutrients and on grain quality in spring wheat crop…	Belgium	1995	OTC	field	6	Minaret	CF	4.23024	7h			g m-2	444.633	12.8767	57.254
Piikki, K.; De Temmerman, L.; Ojanpera, K.; Danielsson, H.; Pleijel, H. The grain quality of spring wheat (triticum aestivum l.) in relation to elevated ozone uptake and carbon dioxide exposure. Eur J Agron 2008, 28, 245-254. Fangmeier, A.; De Temmerman, L.; Mortensen, L.; Kemp, K.; Burke, J.; Mitchell, R.; van Oijen, M.; Weigel, H.J. Effects on nutrients and on grain quality in spring wheat crop…	Belgium	1995	OTC	field	6	Minaret	NF	28.1497	7h			g m-2	383.433	13.9183	53.3675
Piikki, K.; De Temmerman, L.; Ojanpera, K.; Danielsson, H.; Pleijel, H. The grain quality of spring wheat (triticum aestivum l.) in relation to elevated ozone uptake and carbon dioxide exposure. Eur J Agron 2008, 28, 245-254. Fangmeier, A.; De Temmerman, L.; Mortensen, L.; Kemp, K.; Burke, J.; Mitchell, R.; van Oijen, M.; Weigel, H.J. Effects on nutrients and on grain quality in spring wheat crop…	Belgium	1996	OTC	field	6	Minaret	CF	7.36127	7h			g m-2	584.75	18.71	109.407
Piikki, K.; De Temmerman, L.; Ojanpera, K.; Danielsson, H.; Pleijel, H. The grain quality of spring wheat (triticum aestivum l.) in relation to elevated ozone uptake and carbon dioxide exposure. Eur J Agron 2008, 28, 245-254. Fangmeier, A.; De Temmerman, L.; Mortensen, L.; Kemp, K.; Burke, J.; Mitchell, R.; van Oijen, M.; Weigel, H.J. Effects on nutrients and on grain quality in spring wheat crop…	Belgium	1996	OTC	field	6	Minaret	NF	31.4656	7h			g m-2	554.417	18.705	103.704
Fuhrer, J.; Egger, A.; Lehnherr, B.; Grandjean, A.; Tschannen, W. Effects of ozone on the yield of spring wheat (triticum-aestivum l., cv. Albis) grown in open-top field chambers. Environ Pollut 1989, 60, 273-289. Fuhrer, J.; Lehnherr, B.; Moeri, P.B.; Tschannen, W.; Shariatmadari, H. Effects of ozone on the grain composition of spring wheat grown in open-top field chambers. Environ Pollut 1990, …	Switzerland	1986	OTC	field	4	Albis	CF	20	8h		75	g m-2	664	14.9	98.936
Fuhrer, J.; Egger, A.; Lehnherr, B.; Grandjean, A.; Tschannen, W. Effects of ozone on the yield of spring wheat (triticum-aestivum l., cv. Albis) grown in open-top field chambers. Environ Pollut 1989, 60, 273-289. Fuhrer, J.; Lehnherr, B.; Moeri, P.B.; Tschannen, W.; Shariatmadari, H. Effects of ozone on the grain composition of spring wheat grown in open-top field chambers. Environ Pollut 1990, …	Switzerland	1986	OTC	field	4	Albis	NF	35	8h		75	g m-2	611	15.5	94.705
Fuhrer, J.; Egger, A.; Lehnherr, B.; Grandjean, A.; Tschannen, W. Effects of ozone on the yield of spring wheat (triticum-aestivum l., cv. Albis) grown in open-top field chambers. Environ Pollut 1989, 60, 273-289. Fuhrer, J.; Lehnherr, B.; Moeri, P.B.; Tschannen, W.; Shariatmadari, H. Effects of ozone on the grain composition of spring wheat grown in open-top field chambers. Environ Pollut 1990, …	Switzerland	1986	OTC	field	4	Albis	NF+O3	103	8h		75	g m-2	256	19.3	49.408
Fuhrer, J.; Egger, A.; Lehnherr, B.; Grandjean, A.; Tschannen, W. Effects of ozone on the yield of spring wheat (triticum-aestivum l., cv. Albis) grown in open-top field chambers. Environ Pollut 1989, 60, 273-289. Fuhrer, J.; Lehnherr, B.; Moeri, P.B.; Tschannen, W.; Shariatmadari, H. Effects of ozone on the grain composition of spring wheat grown in open-top field chambers. Environ Pollut 1990, …	Switzerland	1987	OTC	field	4	Albis	CF	16	8h		90	g m-2	617	14.6	90.082
Fuhrer, J.; Egger, A.; Lehnherr, B.; Grandjean, A.; Tschannen, W. Effects of ozone on the yield of spring wheat (triticum-aestivum l., cv. Albis) grown in open-top field chambers. Environ Pollut 1989, 60, 273-289. Fuhrer, J.; Lehnherr, B.; Moeri, P.B.; Tschannen, W.; Shariatmadari, H. Effects of ozone on the grain composition of spring wheat grown in open-top field chambers. Environ Pollut 1990, …	Switzerland	1987	OTC	field	4	Albis	NF	33	8h		90	g m-2	554	15.3	84.762
Fuhrer, J.; Egger, A.; Lehnherr, B.; Grandjean, A.; Tschannen, W. Effects of ozone on the yield of spring wheat (triticum-aestivum l., cv. Albis) grown in open-top field chambers. Environ Pollut 1989, 60, 273-289. Fuhrer, J.; Lehnherr, B.; Moeri, P.B.; Tschannen, W.; Shariatmadari, H. Effects of ozone on the grain composition of spring wheat grown in open-top field chambers. Environ Pollut 1990, …	Switzerland	1987	OTC	field	4	Albis	NF+O3	65	8h		90	g m-2	386	15	57.9
Fuhrer, J.; Egger, A.; Lehnherr, B.; Grandjean, A.; Tschannen, W. Effects of ozone on the yield of spring wheat (triticum-aestivum l., cv. Albis) grown in open-top field chambers. Environ Pollut 1989, 60, 273-289. Fuhrer, J.; Lehnherr, B.; Moeri, P.B.; Tschannen, W.; Shariatmadari, H. Effects of ozone on the grain composition of spring wheat grown in open-top field chambers. Environ Pollut 1990, …	Switzerland	1987	OTC	field	4	Albis	NF+O3	95	8h		90	g m-2	213	19.7	41.961
Fuhrer, J.; Egger, A.; Lehnherr, B.; Grandjean, A.; Tschannen, W. Effects of ozone on the yield of spring wheat (triticum-aestivum l., cv. Albis) grown in open-top field chambers. Environ Pollut 1989, 60, 273-289. Fuhrer, J.; Lehnherr, B.; Moeri, P.B.; Tschannen, W.; Shariatmadari, H. Effects of ozone on the grain composition of spring wheat grown in open-top field chambers. Environ Pollut 1990, …	Switzerland	1988	OTC	field	4	Albis	CF	22	8h		112	g m-2	668	14.5	96.86
Fuhrer, J.; Egger, A.; Lehnherr, B.; Grandjean, A.; Tschannen, W. Effects of ozone on the yield of spring wheat (triticum-aestivum l., cv. Albis) grown in open-top field chambers. Environ Pollut 1989, 60, 273-289. Fuhrer, J.; Lehnherr, B.; Moeri, P.B.; Tschannen, W.; Shariatmadari, H. Effects of ozone on the grain composition of spring wheat grown in open-top field chambers. Environ Pollut 1990, …	Switzerland	1988	OTC	field	4	Albis	NF	35	8h		112	g m-2	611	14.3	87.373
Fuhrer, J.; Egger, A.; Lehnherr, B.; Grandjean, A.; Tschannen, W. Effects of ozone on the yield of spring wheat (triticum-aestivum l., cv. Albis) grown in open-top field chambers. Environ Pollut 1989, 60, 273-289. Fuhrer, J.; Lehnherr, B.; Moeri, P.B.; Tschannen, W.; Shariatmadari, H. Effects of ozone on the grain composition of spring wheat grown in open-top field chambers. Environ Pollut 1990, …	Switzerland	1988	OTC	field	4	Albis	NF+O3	63	8h		112	g m-2	461	16.2	74.682
Fuhrer, J.; Egger, A.; Lehnherr, B.; Grandjean, A.; Tschannen, W. Effects of ozone on the yield of spring wheat (triticum-aestivum l., cv. Albis) grown in open-top field chambers. Environ Pollut 1989, 60, 273-289. Fuhrer, J.; Lehnherr, B.; Moeri, P.B.; Tschannen, W.; Shariatmadari, H. Effects of ozone on the grain composition of spring wheat grown in open-top field chambers. Environ Pollut 1990, …	Switzerland	1988	OTC	field	4	Albis	NF+O3	89	8h		112	g m-2	231	19.2	44.352
Fuhrer, J.; Grimm, A.G.; Tschannen, W.; Shariatmadari, H. The response of spring wheat (triticum aestivum l.) to ozone at higher elevations .2. Changes in yield, yield components and grain quality in response to ozone flux. New Phytol 1992, 121, 211-219.	Switzerland	1989	OTC	field	3	Albis	CF	20.0005	7h		25	g m-2	661	12.8	84.608
Fuhrer, J.; Grimm, A.G.; Tschannen, W.; Shariatmadari, H. The response of spring wheat (triticum aestivum l.) to ozone at higher elevations .2. Changes in yield, yield components and grain quality in response to ozone flux. New Phytol 1992, 121, 211-219.	Switzerland	1989	OTC	field	3	Albis	NF	38.89	7h		25	g m-2	630	13.2	83.16
Fuhrer, J.; Grimm, A.G.; Tschannen, W.; Shariatmadari, H. The response of spring wheat (triticum aestivum l.) to ozone at higher elevations .2. Changes in yield, yield components and grain quality in response to ozone flux. New Phytol 1992, 121, 211-219.	Switzerland	1989	OTC	field	3	Albis	NF+O3	53.8904	7h		25	g m-2	536	13.1	70.216
Fuhrer, J.; Grimm, A.G.; Tschannen, W.; Shariatmadari, H. The response of spring wheat (triticum aestivum l.) to ozone at higher elevations .2. Changes in yield, yield components and grain quality in response to ozone flux. New Phytol 1992, 121, 211-219.	Switzerland	1989	OTC	field	3	Albis	NF+O3	67.7796	7h		25	g m-2	467	13.4	62.578
Fuhrer, J.; Grimm, A.G.; Tschannen, W.; Shariatmadari, H. The response of spring wheat (triticum aestivum l.) to ozone at higher elevations .2. Changes in yield, yield components and grain quality in response to ozone flux. New Phytol 1992, 121, 211-219.	Switzerland	1990	OTC	field	3	Albis	CF	18.8182	7h		30	g m-2	739	13.1	96.809
Fuhrer, J.; Grimm, A.G.; Tschannen, W.; Shariatmadari, H. The response of spring wheat (triticum aestivum l.) to ozone at higher elevations .2. Changes in yield, yield components and grain quality in response to ozone flux. New Phytol 1992, 121, 211-219.	Switzerland	1990	OTC	field	3	Albis	NF	42.0642	7h		30	g m-2	688	13.1	90.128
Fuhrer, J.; Grimm, A.G.; Tschannen, W.; Shariatmadari, H. The response of spring wheat (triticum aestivum l.) to ozone at higher elevations .2. Changes in yield, yield components and grain quality in response to ozone flux. New Phytol 1992, 121, 211-219.	Switzerland	1990	OTC	field	3	Albis	NF+O3	60.3289	7h		30	g m-2	630	13.7	86.31
Fuhrer, J.; Grimm, A.G.; Tschannen, W.; Shariatmadari, H. The response of spring wheat (triticum aestivum l.) to ozone at higher elevations .2. Changes in yield, yield components and grain quality in response to ozone flux. New Phytol 1992, 121, 211-219.	Switzerland	1990	OTC	field	3	Albis	NF+O3	77.4867	7h		30	g m-2	502	14.4	72.288
Slaughter, L.H.; Mulchi, C.L.; Lee, E.H.; Tuthill, K. Chronic ozone stress effects on yield and grain quality of soft red winter wheat. Crop Sci. 1989, 29, 1251-1255.	USA	1984	OTC	field	4	Soft red winter wheat	CF	32.1	4h		110	g m-2	172	14.6	25.112
Slaughter, L.H.; Mulchi, C.L.; Lee, E.H.; Tuthill, K. Chronic ozone stress effects on yield and grain quality of soft red winter wheat. Crop Sci. 1989, 29, 1251-1255.	USA	1984	OTC	field	4	Soft red winter wheat	NF	48.6	4h		110	g m-2	152	14.9	22.648
Slaughter, L.H.; Mulchi, C.L.; Lee, E.H.; Tuthill, K. Chronic ozone stress effects on yield and grain quality of soft red winter wheat. Crop Sci. 1989, 29, 1251-1255.	USA	1984	OTC	field	4	Soft red winter wheat	NF+O3	60.5	4h		110	g m-2	165	14.6	24.09
Slaughter, L.H.; Mulchi, C.L.; Lee, E.H.; Tuthill, K. Chronic ozone stress effects on yield and grain quality of soft red winter wheat. Crop Sci. 1989, 29, 1251-1255.	USA	1984	OTC	field	4	Soft red winter wheat	NF+O3	72.6	4h		110	g m-2	152	15.3	23.256
Slaughter, L.H.; Mulchi, C.L.; Lee, E.H.; Tuthill, K. Chronic ozone stress effects on yield and grain quality of soft red winter wheat. Crop Sci. 1989, 29, 1251-1255.	USA	1984	OTC	field	4	Soft red winter wheat	NF+O3	92.7	4h		110	g m-2	102	16.1	16.422
Slaughter, L.H.; Mulchi, C.L.; Lee, E.H.; Tuthill, K. Chronic ozone stress effects on yield and grain quality of soft red winter wheat. Crop Sci. 1989, 29, 1251-1255.	USA	1985	OTC	field	4	Soft red winter wheat	CF	30	4h		110	g m-2	201	12.2	24.522
Slaughter, L.H.; Mulchi, C.L.; Lee, E.H.; Tuthill, K. Chronic ozone stress effects on yield and grain quality of soft red winter wheat. Crop Sci. 1989, 29, 1251-1255.	USA	1985	OTC	field	4	Soft red winter wheat	NF	36.4	4h		110	g m-2	194	11.8	22.892
Slaughter, L.H.; Mulchi, C.L.; Lee, E.H.; Tuthill, K. Chronic ozone stress effects on yield and grain quality of soft red winter wheat. Crop Sci. 1989, 29, 1251-1255.	USA	1985	OTC	field	4	Soft red winter wheat	NF+O3	47.1	4h		110	g m-2	201	11.8	23.718
Slaughter, L.H.; Mulchi, C.L.; Lee, E.H.; Tuthill, K. Chronic ozone stress effects on yield and grain quality of soft red winter wheat. Crop Sci. 1989, 29, 1251-1255.	USA	1985	OTC	field	4	Soft red winter wheat	NF+O3	60.9	4h		110	g m-2	213	12	25.56
Slaughter, L.H.; Mulchi, C.L.; Lee, E.H.; Tuthill, K. Chronic ozone stress effects on yield and grain quality of soft red winter wheat. Crop Sci. 1989, 29, 1251-1255.	USA	1985	OTC	field	4	Soft red winter wheat	NF+O3	86.3	4h		110	g m-2	182	12.4	22.568
Mulchi, C.; Rudorff, B.; Lee, E.; Rowland, R.; Pausch, R. Morphological responses among crop species to full-season exposures to enhanced concentrations of atmospheric co2 and o-3. Water Air Soil Poll 1995, 85, 1379-1386. Rudorff, B.F.T.; Mulchi, C.L.; Daughtry, C.S.T.; Lee, E.H. Growth, radiation use efficiency, and canopy reflectance of wheat and corn grown under elevated ozone and carbon dioxi…	USA	1991	OTC	field	4	Massey and Saluda	CF	18.6	7h		60	g m-2	582	10.6	61.692
Mulchi, C.; Rudorff, B.; Lee, E.; Rowland, R.; Pausch, R. Morphological responses among crop species to full-season exposures to enhanced concentrations of atmospheric co2 and o-3. Water Air Soil Poll 1995, 85, 1379-1386. Rudorff, B.F.T.; Mulchi, C.L.; Daughtry, C.S.T.; Lee, E.H. Growth, radiation use efficiency, and canopy reflectance of wheat and corn grown under elevated ozone and carbon dioxi…	USA	1991	OTC	field	4	Massey and Saluda	NF+O3	60.7	7h		60	g m-2	494	11.5	56.81
Mulchi, C.; Rudorff, B.; Lee, E.; Rowland, R.; Pausch, R. Morphological responses among crop species to full-season exposures to enhanced concentrations of atmospheric co2 and o-3. Water Air Soil Poll 1995, 85, 1379-1386. Rudorff, B.F.T.; Mulchi, C.L.; Daughtry, C.S.T.; Lee, E.H. Growth, radiation use efficiency, and canopy reflectance of wheat and corn grown under elevated ozone and carbon dioxi…	USA	1992	OTC	field	4	Massey and Saluda	CF	20.2	7h		60	g m-2	541	7.9	42.739
Mulchi, C.; Rudorff, B.; Lee, E.; Rowland, R.; Pausch, R. Morphological responses among crop species to full-season exposures to enhanced concentrations of atmospheric co2 and o-3. Water Air Soil Poll 1995, 85, 1379-1386. Rudorff, B.F.T.; Mulchi, C.L.; Daughtry, C.S.T.; Lee, E.H. Growth, radiation use efficiency, and canopy reflectance of wheat and corn grown under elevated ozone and carbon dioxi…	USA	1992	OTC	field	4	Massey and Saluda	NF+O3	64.8	7h		60	g m-2	483	8.3	40.089
Pleijel, H.; Skarby, L.; Wallin, G.; Sellden, G. Yield and grain quality of spring wheat (triticum-aestivum l, cv drabant) exposed to different concentrations of ozone in open-top chambers. Environ Pollut 1991, 69, 151-168.	Sweden	1987	OTC	field	7	Drabant	CF	3	7h		120	g m-2	423	12.6	53.298
Pleijel, H.; Skarby, L.; Wallin, G.; Sellden, G. Yield and grain quality of spring wheat (triticum-aestivum l, cv drabant) exposed to different concentrations of ozone in open-top chambers. Environ Pollut 1991, 69, 151-168.	Sweden	1987	OTC	field	7	Drabant	NF	15	7h		120	g m-2	396	12.2	48.312
Pleijel, H.; Skarby, L.; Wallin, G.; Sellden, G. Yield and grain quality of spring wheat (triticum-aestivum l, cv drabant) exposed to different concentrations of ozone in open-top chambers. Environ Pollut 1991, 69, 151-168.	Sweden	1987	OTC	field	7	Drabant	NF+O3	42	7h		120	g m-2	368	13.8	50.784
Pleijel, H.; Skarby, L.; Wallin, G.; Sellden, G. Yield and grain quality of spring wheat (triticum-aestivum l, cv drabant) exposed to different concentrations of ozone in open-top chambers. Environ Pollut 1991, 69, 151-168.	Sweden	1988	OTC	field	5	Drabant	CF	6	7h		120	g m-2	615	13.6	83.64
Pleijel, H.; Skarby, L.; Wallin, G.; Sellden, G. Yield and grain quality of spring wheat (triticum-aestivum l, cv drabant) exposed to different concentrations of ozone in open-top chambers. Environ Pollut 1991, 69, 151-168.	Sweden	1988	OTC	field	5	Drabant	NF	22	7h		120	g m-2	577	13.7	79.049
Pleijel, H.; Skarby, L.; Wallin, G.; Sellden, G. Yield and grain quality of spring wheat (triticum-aestivum l, cv drabant) exposed to different concentrations of ozone in open-top chambers. Environ Pollut 1991, 69, 151-168.	Sweden	1988	OTC	field	5	Drabant	NF+O3	44	7h		120	g m-2	535	14.2	75.97
Pleijel, H.; Skarby, L.; Wallin, G.; Sellden, G. Yield and grain quality of spring wheat (triticum-aestivum l, cv drabant) exposed to different concentrations of ozone in open-top chambers. Environ Pollut 1991, 69, 151-168.	Sweden	1988	OTC	field	5	Drabant	NF+O3	56	7h		120	g m-2	448	15.2	68.096
Pleijel, H.; Gelang, J.; Sild, E.; Danielsson, H.; Younis, S.; Karlsson, P.E.; Wallin, G.; Skarby, L.; Sellden, G. Effects of elevated carbon dioxide, ozone and water availability on spring wheat growth and yield. Physiol Plantarum 2000, 108, 61-70.	Sweden	1994	OTC	field	3	Dragon	NF	33	12h		120	g m-2	569	15.5	88.195
Pleijel, H.; Gelang, J.; Sild, E.; Danielsson, H.; Younis, S.; Karlsson, P.E.; Wallin, G.; Skarby, L.; Sellden, G. Effects of elevated carbon dioxide, ozone and water availability on spring wheat growth and yield. Physiol Plantarum 2000, 108, 61-70.	Sweden	1994	OTC	field	3	Dragon	NF+O3	39	12h		120	g m-2	559.083	15.73	87.9438
Pleijel, H.; Gelang, J.; Sild, E.; Danielsson, H.; Younis, S.; Karlsson, P.E.; Wallin, G.; Skarby, L.; Sellden, G. Effects of elevated carbon dioxide, ozone and water availability on spring wheat growth and yield. Physiol Plantarum 2000, 108, 61-70.	Sweden	1994	OTC	field	3	Dragon	NF+O3	46	12h		120	g m-2	504.392	16.53	83.376
Pleijel, H.; Gelang, J.; Sild, E.; Danielsson, H.; Younis, S.; Karlsson, P.E.; Wallin, G.; Skarby, L.; Sellden, G. Effects of elevated carbon dioxide, ozone and water availability on spring wheat growth and yield. Physiol Plantarum 2000, 108, 61-70.	Sweden	1994	OTC	field	3	Dragon	NF+O3	54	12h		120	g m-2	500.315	16.7	83.5526
Gelang, J.; Pleijel, H.; Sild, E.; Danielsson, H.; Younis, S.; Sellden, G. Rate and duration of grain filling in relation to flag leaf senescence and grain yield in spring wheat (triticum aestivum) exposed to different concentrations of ozone. Physiol Plantarum 2000, 110, 366-375. Gelang, J.; Sellden, G.; Younis, S.; Pleijel, H. Effects of ozone on biomass, non-structural carbohydrates and nitrog…	Sweden	1997	OTC	field	4	Dragon	CF	7	12h		120	g m-2	584	14.5	84.68
Gelang, J.; Pleijel, H.; Sild, E.; Danielsson, H.; Younis, S.; Sellden, G. Rate and duration of grain filling in relation to flag leaf senescence and grain yield in spring wheat (triticum aestivum) exposed to different concentrations of ozone. Physiol Plantarum 2000, 110, 366-375. Gelang, J.; Sellden, G.; Younis, S.; Pleijel, H. Effects of ozone on biomass, non-structural carbohydrates and nitrog…	Sweden	1997	OTC	field	4	Dragon	NF	20	12h		120	g m-2	606	14.6	88.476
Gelang, J.; Pleijel, H.; Sild, E.; Danielsson, H.; Younis, S.; Sellden, G. Rate and duration of grain filling in relation to flag leaf senescence and grain yield in spring wheat (triticum aestivum) exposed to different concentrations of ozone. Physiol Plantarum 2000, 110, 366-375. Gelang, J.; Sellden, G.; Younis, S.; Pleijel, H. Effects of ozone on biomass, non-structural carbohydrates and nitrog…	Sweden	1997	OTC	field	4	Dragon	NF+O3	34	12h		120	g m-2	497	14.8	73.556
Gelang, J.; Pleijel, H.; Sild, E.; Danielsson, H.; Younis, S.; Sellden, G. Rate and duration of grain filling in relation to flag leaf senescence and grain yield in spring wheat (triticum aestivum) exposed to different concentrations of ozone. Physiol Plantarum 2000, 110, 366-375. Gelang, J.; Sellden, G.; Younis, S.; Pleijel, H. Effects of ozone on biomass, non-structural carbohydrates and nitrog…	Sweden	1997	OTC	field	4	Dragon	NF+O3	48	12h		120	g m-2	414	16.1	66.654
Gelang, J.; Pleijel, H.; Sild, E.; Danielsson, H.; Younis, S.; Sellden, G. Rate and duration of grain filling in relation to flag leaf senescence and grain yield in spring wheat (triticum aestivum) exposed to different concentrations of ozone. Physiol Plantarum 2000, 110, 366-375. Gelang, J.; Sellden, G.; Younis, S.; Pleijel, H. Effects of ozone on biomass, non-structural carbohydrates and nitrog…	Sweden	1997	OTC	field	4	Dragon	NF+O3	62	12h		120	g m-2	313	16.8	52.584
Pleijel, H.; Eriksen, A.B.; Danielsson, H.; Bondesson, N.; Selldén, G. Differential ozone sensitivity in an old and a modern swedish wheat cultivar—grain yield and quality, leaf chlorophyll and stomatal conductance. Environmental and Experimental Botany 2006, 56, 63-71.	Sweden	1999	OTC	field	6	Dragon	CF	9	12h		120		1.3169	15.295	0.20142
Pleijel, H.; Eriksen, A.B.; Danielsson, H.; Bondesson, N.; Selldén, G. Differential ozone sensitivity in an old and a modern swedish wheat cultivar—grain yield and quality, leaf chlorophyll and stomatal conductance. Environmental and Experimental Botany 2006, 56, 63-71.	Sweden	1999	OTC	field	6	Dragon	NF+O3	57	12h		120		0.94216	17.0031	0.160196
Pleijel, H.; Eriksen, A.B.; Danielsson, H.; Bondesson, N.; Selldén, G. Differential ozone sensitivity in an old and a modern swedish wheat cultivar—grain yield and quality, leaf chlorophyll and stomatal conductance. Environmental and Experimental Botany 2006, 56, 63-71.	Sweden	1999	OTC	field	6	Lantvete	CF	9	12h		120		0.86338	21.0404	0.181658
Pleijel, H.; Eriksen, A.B.; Danielsson, H.; Bondesson, N.; Selldén, G. Differential ozone sensitivity in an old and a modern swedish wheat cultivar—grain yield and quality, leaf chlorophyll and stomatal conductance. Environmental and Experimental Botany 2006, 56, 63-71.	Sweden	1999	OTC	field	6	Lantvete	NF+O3	52	12h		120		0.7112	22.3602	0.159026
Zheng, F.; Wang, X.; Zhang, W.; Hou, P.; Lu, F.; Du, K.; Sun, Z. Effects of elevated o(3) exposure on nutrient elements and quality of winter wheat and rice grain in yangtze river delta, china. Environmental pollution 2013, 179, 19-26. Wang, X.; Zhang, Q.; Zheng, F.; Zheng, Q.; Yao, F.; Chen, Z.; Zhang, W.; Hou, P.; Feng, Z.; Song, W., et al. Effects of elevated o(3) concentration on winter wheat…	China	2007	OTC	field	3	Jia 002	CF	11.64	8h		214.65	g plant-1	1.65	13.6384	0.225034
Zheng, F.; Wang, X.; Zhang, W.; Hou, P.; Lu, F.; Du, K.; Sun, Z. Effects of elevated o(3) exposure on nutrient elements and quality of winter wheat and rice grain in yangtze river delta, china. Environmental pollution 2013, 179, 19-26. Wang, X.; Zhang, Q.; Zheng, F.; Zheng, Q.; Yao, F.; Chen, Z.; Zhang, W.; Hou, P.; Feng, Z.; Song, W., et al. Effects of elevated o(3) concentration on winter wheat…	China	2007	OTC	field	3	Jia 002	NF	27.7	8h		214.65	g plant-1	1.61	14.0046	0.225474
Zheng, F.; Wang, X.; Zhang, W.; Hou, P.; Lu, F.; Du, K.; Sun, Z. Effects of elevated o(3) exposure on nutrient elements and quality of winter wheat and rice grain in yangtze river delta, china. Environmental pollution 2013, 179, 19-26. Wang, X.; Zhang, Q.; Zheng, F.; Zheng, Q.; Yao, F.; Chen, Z.; Zhang, W.; Hou, P.; Feng, Z.; Song, W., et al. Effects of elevated o(3) concentration on winter wheat…	China	2007	OTC	field	3	Jia 002	CF+O3	51.53	8h		214.65	g plant-1	1.51	14.0503	0.21216
Zheng, F.; Wang, X.; Zhang, W.; Hou, P.; Lu, F.; Du, K.; Sun, Z. Effects of elevated o(3) exposure on nutrient elements and quality of winter wheat and rice grain in yangtze river delta, china. Environmental pollution 2013, 179, 19-26. Wang, X.; Zhang, Q.; Zheng, F.; Zheng, Q.; Yao, F.; Chen, Z.; Zhang, W.; Hou, P.; Feng, Z.; Song, W., et al. Effects of elevated o(3) concentration on winter wheat…	China	2007	OTC	field	3	Jia 002	CF+O3	98.44	8h		214.65	g plant-1	0.99	16.1098	0.159487
Zheng, F.; Wang, X.; Zhang, W.; Hou, P.; Lu, F.; Du, K.; Sun, Z. Effects of elevated o(3) exposure on nutrient elements and quality of winter wheat and rice grain in yangtze river delta, china. Environmental pollution 2013, 179, 19-26. Wang, X.; Zhang, Q.; Zheng, F.; Zheng, Q.; Yao, F.; Chen, Z.; Zhang, W.; Hou, P.; Feng, Z.; Song, W., et al. Effects of elevated o(3) concentration on winter wheat…	China	2008	OTC	field	3	Jia 002	CF	20.32	8h		214.65	g plant-1	1.57	13.9588	0.219153
Zheng, F.; Wang, X.; Zhang, W.; Hou, P.; Lu, F.; Du, K.; Sun, Z. Effects of elevated o(3) exposure on nutrient elements and quality of winter wheat and rice grain in yangtze river delta, china. Environmental pollution 2013, 179, 19-26. Wang, X.; Zhang, Q.; Zheng, F.; Zheng, Q.; Yao, F.; Chen, Z.; Zhang, W.; Hou, P.; Feng, Z.; Song, W., et al. Effects of elevated o(3) concentration on winter wheat…	China	2008	OTC	field	3	Jia 002	NF	27.66	8h		214.65	g plant-1	1.55	14.0503	0.21778
Zheng, F.; Wang, X.; Zhang, W.; Hou, P.; Lu, F.; Du, K.; Sun, Z. Effects of elevated o(3) exposure on nutrient elements and quality of winter wheat and rice grain in yangtze river delta, china. Environmental pollution 2013, 179, 19-26. Wang, X.; Zhang, Q.; Zheng, F.; Zheng, Q.; Yao, F.; Chen, Z.; Zhang, W.; Hou, P.; Feng, Z.; Song, W., et al. Effects of elevated o(3) concentration on winter wheat…	China	2008	OTC	field	3	Jia 002	CF+O3	96.48	8h		214.65	g plant-1	0.86	14.0503	0.120833
Zheng, F.; Wang, X.; Zhang, W.; Hou, P.; Lu, F.; Du, K.; Sun, Z. Effects of elevated o(3) exposure on nutrient elements and quality of winter wheat and rice grain in yangtze river delta, china. Environmental pollution 2013, 179, 19-26. Wang, X.; Zhang, Q.; Zheng, F.; Zheng, Q.; Yao, F.; Chen, Z.; Zhang, W.; Hou, P.; Feng, Z.; Song, W., et al. Effects of elevated o(3) concentration on winter wheat…	China	2008	OTC	field	3	Jia 002	CF+O3	142.66	8h		214.65	g plant-1	0.58	14.9657	0.0868009
Ojanperä, K.; Pätsikkä, E.; Yläranta, T. Effects of low ozon exposure of spring wheat on net co2 uptake, rubisco, leaf senescence and grain filling. New Phytol. 1998, 138, 451-460. Pleijel, H.; Ojanpera, K.; Mortensen, L. Effects of tropospheric ozone on the yield and grain protein content of spring wheat (triticum aestivum l) in the nordic countries. Acta Agr Scand B-S P 1997, 47, 20-25. Ojanper…	Finland	1992	OTC	field	5	Satu	NF	30	8h		110	g m-2	370	12.1	44.77
Ojanperä, K.; Pätsikkä, E.; Yläranta, T. Effects of low ozon exposure of spring wheat on net co2 uptake, rubisco, leaf senescence and grain filling. New Phytol. 1998, 138, 451-460. Pleijel, H.; Ojanpera, K.; Mortensen, L. Effects of tropospheric ozone on the yield and grain protein content of spring wheat (triticum aestivum l) in the nordic countries. Acta Agr Scand B-S P 1997, 47, 20-25. Ojanper…	Finland	1992	OTC	field	5	Satu	NF+O3	61	8h		110	g m-2	305	12.7	38.735
Ojanperä, K.; Pätsikkä, E.; Yläranta, T. Effects of low ozon exposure of spring wheat on net co2 uptake, rubisco, leaf senescence and grain filling. New Phytol. 1998, 138, 451-460. Pleijel, H.; Ojanpera, K.; Mortensen, L. Effects of tropospheric ozone on the yield and grain protein content of spring wheat (triticum aestivum l) in the nordic countries. Acta Agr Scand B-S P 1997, 47, 20-25. Ojanper…	Finland	1993	OTC	field	5	Satu	CF	9	8h		115	g m-2	480	11.5	55.2
Ojanperä, K.; Pätsikkä, E.; Yläranta, T. Effects of low ozon exposure of spring wheat on net co2 uptake, rubisco, leaf senescence and grain filling. New Phytol. 1998, 138, 451-460. Pleijel, H.; Ojanpera, K.; Mortensen, L. Effects of tropospheric ozone on the yield and grain protein content of spring wheat (triticum aestivum l) in the nordic countries. Acta Agr Scand B-S P 1997, 47, 20-25. Ojanper…	Finland	1993	OTC	field	5	Satu	NF	21	8h		115	g m-2	450	12	54
Ojanperä, K.; Pätsikkä, E.; Yläranta, T. Effects of low ozon exposure of spring wheat on net co2 uptake, rubisco, leaf senescence and grain filling. New Phytol. 1998, 138, 451-460. Pleijel, H.; Ojanpera, K.; Mortensen, L. Effects of tropospheric ozone on the yield and grain protein content of spring wheat (triticum aestivum l) in the nordic countries. Acta Agr Scand B-S P 1997, 47, 20-25. Ojanper…	Finland	1993	OTC	field	5	Satu	NF+O3	45	8h		115	g m-2	420	13.2	55.44
Mortensen, L.; Engvild, K.C. Effects of ozone on c-14 translocation velocity and growth of spring wheat (triticum-aestivum l) exposed in open-top chambers. Environ Pollut 1995, 87, 135-140.	Denmark	1991	OTC	field	5	Ralle	CF	17	8h		150	g plant-1	3.7	17.9	0.6623
Mortensen, L.; Engvild, K.C. Effects of ozone on c-14 translocation velocity and growth of spring wheat (triticum-aestivum l) exposed in open-top chambers. Environ Pollut 1995, 87, 135-140.	Denmark	1991	OTC	field	5	Ralle	NF	29	8h		150	g plant-1	3.3	18.1	0.5973
Mortensen, L.; Engvild, K.C. Effects of ozone on c-14 translocation velocity and growth of spring wheat (triticum-aestivum l) exposed in open-top chambers. Environ Pollut 1995, 87, 135-140.	Denmark	1991	OTC	field	5	Ralle	NF+O3	61	8h		150	g plant-1	2.7	18.1	0.4887
Tomer, R.; Bhatia, A.; Kumar, V.; Kumar, A.; Singh, R.; Singh, B.; Singh, S.D. Impact of elevated ozone on growth, yield and nutritional quality of two wheat species in northern india. Aerosol Air Qual Res 2015, 15, 329-340.	India	2008-2009	OTC	field	3	PBW 343	CF	5.25	7h		120	g m-2	527	1.07	563.89
Tomer, R.; Bhatia, A.; Kumar, V.; Kumar, A.; Singh, R.; Singh, B.; Singh, S.D. Impact of elevated ozone on growth, yield and nutritional quality of two wheat species in northern india. Aerosol Air Qual Res 2015, 15, 329-340.	India	2008-2009	OTC	field	3	PBW 343	NF	30.9	7h		120	g m-2	439	1	439
Tomer, R.; Bhatia, A.; Kumar, V.; Kumar, A.; Singh, R.; Singh, B.; Singh, S.D. Impact of elevated ozone on growth, yield and nutritional quality of two wheat species in northern india. Aerosol Air Qual Res 2015, 15, 329-340.	India	2008-2009	OTC	field	3	PBW 343	NF+O3	59.2	7h		120	g m-2	369	0.932121	343.953
Tomer, R.; Bhatia, A.; Kumar, V.; Kumar, A.; Singh, R.; Singh, B.; Singh, S.D. Impact of elevated ozone on growth, yield and nutritional quality of two wheat species in northern india. Aerosol Air Qual Res 2015, 15, 329-340.	India	2009-2010	OTC	field	3	PBW 343	CF	7.69	7h		120	g m-2	499	1.06816	533.011
Tomer, R.; Bhatia, A.; Kumar, V.; Kumar, A.; Singh, R.; Singh, B.; Singh, S.D. Impact of elevated ozone on growth, yield and nutritional quality of two wheat species in northern india. Aerosol Air Qual Res 2015, 15, 329-340.	India	2009-2010	OTC	field	3	PBW 343	NF	34.9	7h		120	g m-2	423	1	423
Tomer, R.; Bhatia, A.; Kumar, V.; Kumar, A.; Singh, R.; Singh, B.; Singh, S.D. Impact of elevated ozone on growth, yield and nutritional quality of two wheat species in northern india. Aerosol Air Qual Res 2015, 15, 329-340.	India	2009-2010	OTC	field	3	PBW 343	NF+O3	65.35	7h		120	g m-2	345	0.927879	320.118
Yadav, A.; Bhatia, A.; Yadav, S.; Kumar, V.; Singh, B. The effects of elevated co2 and elevated o-3 exposure on plant growth, yield and quality of grains of two wheat cultivars grown in north india. Heliyon 2019, 5.	India	2016-2017/2017-2018	FACE	field	4	HD-2967	NF	30.7	7h		20	g m-2	430	11.8	5074
Yadav, A.; Bhatia, A.; Yadav, S.; Kumar, V.; Singh, B. The effects of elevated co2 and elevated o-3 exposure on plant growth, yield and quality of grains of two wheat cultivars grown in north india. Heliyon 2019, 5.	India	2016-2017/2017-2018	FACE	field	4	HD-2967	NF+O3	72.2	7h		20	g m-2	380	13.4	5092
Yadav, A.; Bhatia, A.; Yadav, S.; Kumar, V.; Singh, B. The effects of elevated co2 and elevated o-3 exposure on plant growth, yield and quality of grains of two wheat cultivars grown in north india. Heliyon 2019, 5.	India	2016-2017/2017-2018	FACE	field	4	C-306	NF	30.7	7h		20	g m-2	470	11.7	5499
Yadav, A.; Bhatia, A.; Yadav, S.; Kumar, V.; Singh, B. The effects of elevated co2 and elevated o-3 exposure on plant growth, yield and quality of grains of two wheat cultivars grown in north india. Heliyon 2019, 5.	India	2016-2017/2017-2018	FACE	field	4	C-306	NF+O3	72.2	7h		20	g m-2	430	13.5	5805
Singh, P.; Agrawal, M.; Agrawal, S.B.; Singh, S.; Singh, A. Genotypic differences in utilization of nutrients in wheat under ambient ozone concentrations: Growth, biomass and yield. Agriculture, Ecosystems and Environment 2015, 199, 26-33.	India	2010-2011	OTC	field	3	HUW 510	CF	30.281		normal	80	g plant-1	10.9	12.22	133.198
Singh, P.; Agrawal, M.; Agrawal, S.B.; Singh, S.; Singh, A. Genotypic differences in utilization of nutrients in wheat under ambient ozone concentrations: Growth, biomass and yield. Agriculture, Ecosystems and Environment 2015, 199, 26-33.	India	2010-2011	OTC	field	3	HUW 510	NF	58.2		normal	80	g plant-1	10.1	9.04	91.304
Singh, P.; Agrawal, M.; Agrawal, S.B.; Singh, S.; Singh, A. Genotypic differences in utilization of nutrients in wheat under ambient ozone concentrations: Growth, biomass and yield. Agriculture, Ecosystems and Environment 2015, 199, 26-33.	India	2010-2011	OTC	field	3	HUW 510	CF	30.281		high	120	g plant-1	10.9	15.4	167.86
Singh, P.; Agrawal, M.; Agrawal, S.B.; Singh, S.; Singh, A. Genotypic differences in utilization of nutrients in wheat under ambient ozone concentrations: Growth, biomass and yield. Agriculture, Ecosystems and Environment 2015, 199, 26-33.	India	2010-2011	OTC	field	3	HUW 510	NF	58.2		high	120	g plant-1	10.5	14.22	149.31
Singh, P.; Agrawal, M.; Agrawal, S.B.; Singh, S.; Singh, A. Genotypic differences in utilization of nutrients in wheat under ambient ozone concentrations: Growth, biomass and yield. Agriculture, Ecosystems and Environment 2015, 199, 26-33.	India	2010-2011	OTC	field	3	LOK-1	CF	30.281		normal	80	g plant-1	8	7.89	63.12
Singh, P.; Agrawal, M.; Agrawal, S.B.; Singh, S.; Singh, A. Genotypic differences in utilization of nutrients in wheat under ambient ozone concentrations: Growth, biomass and yield. Agriculture, Ecosystems and Environment 2015, 199, 26-33.	India	2010-2011	OTC	field	3	LOK-1	NF	58.2		normal	80	g plant-1	6.7	7.75	51.925
Singh, P.; Agrawal, M.; Agrawal, S.B.; Singh, S.; Singh, A. Genotypic differences in utilization of nutrients in wheat under ambient ozone concentrations: Growth, biomass and yield. Agriculture, Ecosystems and Environment 2015, 199, 26-33.	India	2010-2011	OTC	field	3	LOK-1	CF	30.281		high	120	g plant-1	10.7	9.62	102.934
Singh, P.; Agrawal, M.; Agrawal, S.B.; Singh, S.; Singh, A. Genotypic differences in utilization of nutrients in wheat under ambient ozone concentrations: Growth, biomass and yield. Agriculture, Ecosystems and Environment 2015, 199, 26-33.	India	2010-2011	OTC	field	3	LOK-1	NF	58.2		high	120	g plant-1	10.2	9.58	97.716
